# Supplementary material for: Fabrication and enhanced simulated sunlight photocatalytic activity of metallic platinum and indium oxide codoped titania nanotubes
Source: Royal Society of Chemistry journal article supplement (doi:10.1039/c5ra05404d), 2015-01-01

Electronic supporting information

**Fabrication and enhanced the simulated sunlight photocatalytic  
activity of metallic platinum and indium oxide codoped titania  
nanotubes**

Fengyan Ma,<sup>a,\*</sup> Zhi Geng<sup>b</sup> and Jiyan Leng<sup>c</sup>

<sup>a</sup> *College of Chemistry and Chemical Engineering, Qiqihar University, Qiqihar  
161006, Heilongjiang, PR China*

<sup>b</sup> *School of Environment, Northeast Normal University, Changchun 130117, PR  
China*

<sup>c</sup> *First hospital of Jilin University, Jilin University, Changchun 130021, PR China*

**Table 1**Textural parameters of various TiO<sub>2</sub>-based materials

| Samples                                                                 | S <sub>BET</sub> (m <sup>2</sup> g <sup>-1</sup> ) | V <sub>p</sub> (cm <sup>3</sup> g <sup>-1</sup> ) | D <sub>p</sub> (nm) |
|-------------------------------------------------------------------------|----------------------------------------------------|---------------------------------------------------|---------------------|
| TiO <sub>2</sub> -NTs                                                   | 250.8                                              | 0.57                                              | 9.07                |
| Pt/In <sub>2</sub> O <sub>3</sub> -TiO <sub>2</sub> -NTs-(0, 9.4)       | 183.8                                              | 0.55                                              | 11.02               |
| Pt/In <sub>2</sub> O <sub>3</sub> -TiO <sub>2</sub> -NTs-(0, 12.0)      | 147.3                                              | –                                                 | –                   |
| Pt/In <sub>2</sub> O <sub>3</sub> -TiO <sub>2</sub> -NTs-(0.4, 9.4)     | 186.0                                              | –                                                 | –                   |
| Pt/In <sub>2</sub> O <sub>3</sub> -TiO <sub>2</sub> -NTs-(0.8, 9.4)     | 123.7                                              | 0.48                                              | 16.14               |
| Pt/In <sub>2</sub> O <sub>3</sub> -TiO <sub>2</sub> -NTs-(6.9, 9.4)     | 65.1                                               | –                                                 | –                   |
| Pt/In <sub>2</sub> O <sub>3</sub> -TiO <sub>2</sub> -NPs-(0.8, 9.4)     | 134.8                                              | 0.26                                              | 5.76                |
| Pt/In <sub>2</sub> O <sub>3</sub> -TiO <sub>2</sub> -NTs-(0.8, 9.4)-573 | 237.6                                              | –                                                 | –                   |
| Pt/In <sub>2</sub> O <sub>3</sub> -TiO <sub>2</sub> -NTs-(0.8, 9.4)-773 | 64.1                                               | –                                                 | –                   |

Fig. S1 HRTEM images of the Pt/In<sub>2</sub>O<sub>3</sub>-TiO<sub>2</sub>-NTs-(0.4, 9.4) (a) and Pt/In<sub>2</sub>O<sub>3</sub>-TiO<sub>2</sub>-NTs-(6.9, 9.4) (b).

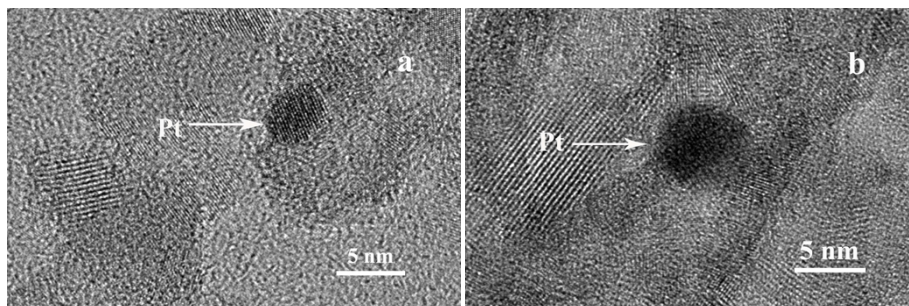

Fig. S2 FT-IR spectra of Pt/In<sub>2</sub>O<sub>3</sub>-TiO<sub>2</sub>-NTs-(0.8, 9.4) and Pt/In<sub>2</sub>O<sub>3</sub>-TiO<sub>2</sub>-NPs-(0.8, 9.4).

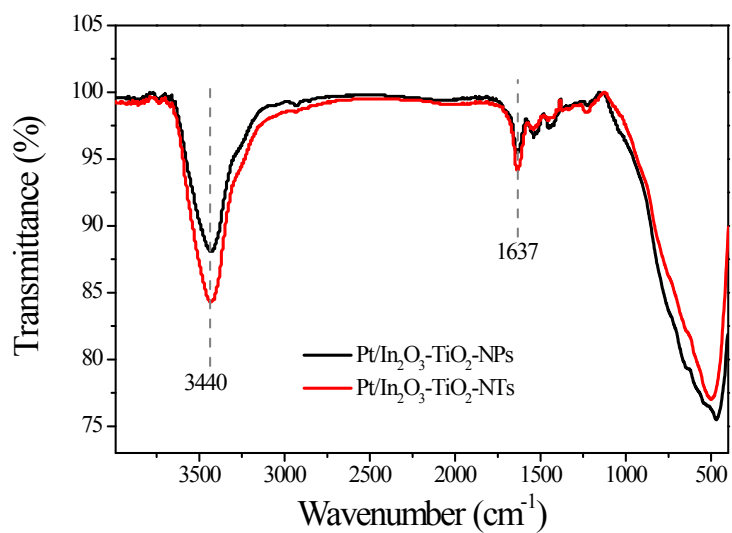

Fig. S3. Changes of TOC in the reaction systems during the process of the simulated sunlight photocatalytic degradation of DEP over Pt/In<sub>2</sub>O<sub>3</sub>-TiO<sub>2</sub>-NTs-(0.8, 9.4). TOC<sub>0</sub> and TOC<sub>t</sub> is the original and residual DEP total organic carbon in the reaction system. C<sub>0</sub><sup>DEP</sup>= 10 mg L<sup>-1</sup>; volume: 100 mL; catalyst: 100 mg.

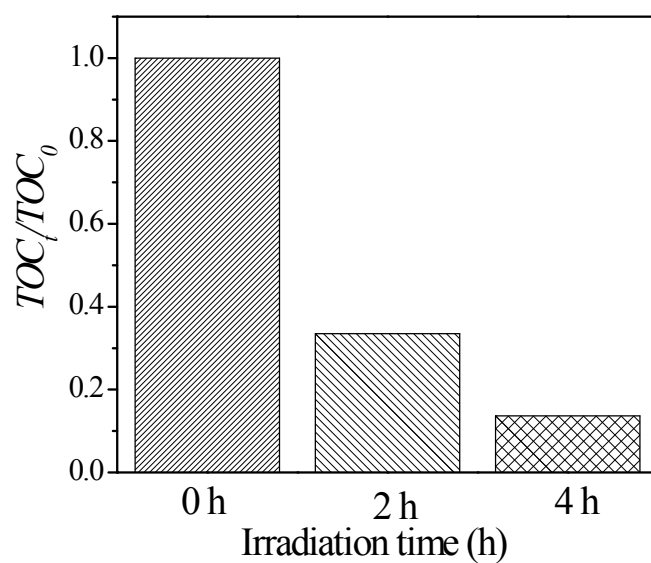

Fig. S4 TEM (a) and HRTEM (b) images of the Pt/In<sub>2</sub>O<sub>3</sub>-TiO<sub>2</sub>-NTs-(0.8, 9.4) after recycling for 5 times.

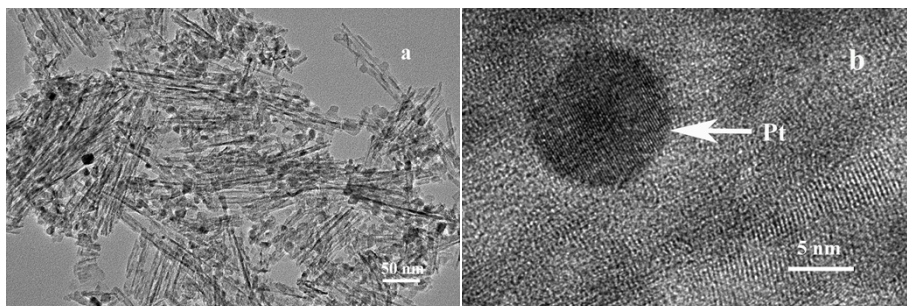

Supplement: c5ra05404d1.pdf [file c5ra05404d1.pdf]
